# Supplementary material for: A Structural Comparison of Ordered and Non-Ordered Ion Doped Silicate Bioactive Glasses
Source: MDPI journal article supplement (doi:10.3390/ma13040992), 2020-02-22
Supplement: s1 [file s1]

Supplementary Materials

# A Structural Comparison of Ordered and Non-Ordered Ion Doped Silicate Bioactive Glasses

Seray Schmitz <sup>1</sup>, Ana M. Beltrán <sup>2</sup>, Mark Cresswell <sup>3</sup> and Aldo R. Boccaccini <sup>1,\*</sup>

<sup>1</sup> Institute of Biomaterials, University of Erlangen-Nuremberg, Cauerstrasse 6, 91058 Erlangen, Germany; seray.kaya@fau.de

<sup>2</sup> Department of Materials and Transport Science Engineering, University of Seville, 41011 Seville, Spain; abeltran3@us.es

<sup>3</sup> Lucideon Ltd., Queens Road, ST4 7LQ Stoke-on-Trent, UK; Mark.Cresswell@lucideon.com

\* Correspondence: aldo.boccaccini@ww.uni-erlangen.de; Tel.: +49 (0)9131-85-28601

Received: 21 January 2020; Accepted: 20 February 2020; Published: 22 February 2020

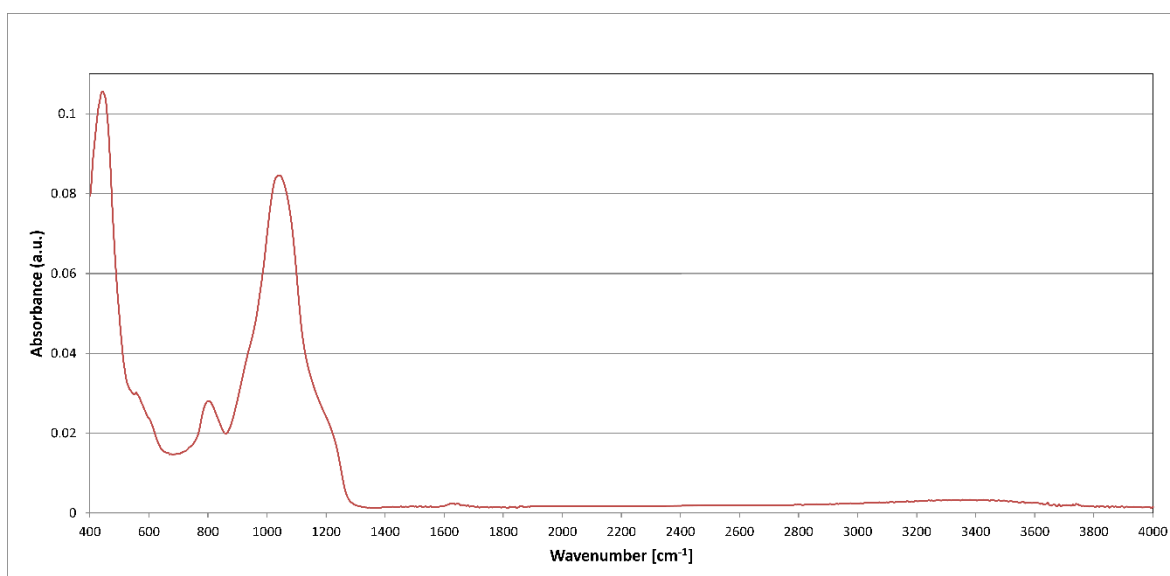

**Figure S1.** FTIR spectrum of ordered 5 wt% Cu-MSG.

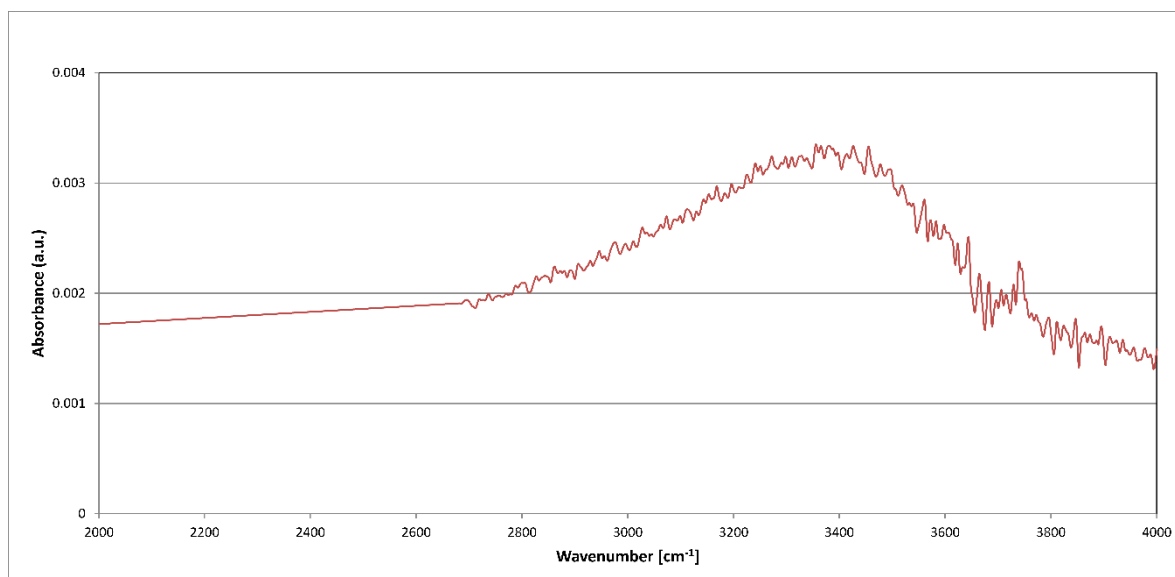

**Figure S2.** FTIR spectrum of ordered 5 wt% Cu-MSG focused to the specific region of 3000–3700 cm<sup>-1</sup> wavenumber.
